# Supplementary material
Source: HighWire-hosted journal article supplement (https://jnm.snmjournals.org/highwire/filestream/95297/field_highwire_adjunct_files/0/200964_Supplemental_Data.pdf)
Supplement: 200964_Supplemental_Data.pdf [file 200964_Supplemental_Data.pdf]

SUPPLEMENTAL DATA

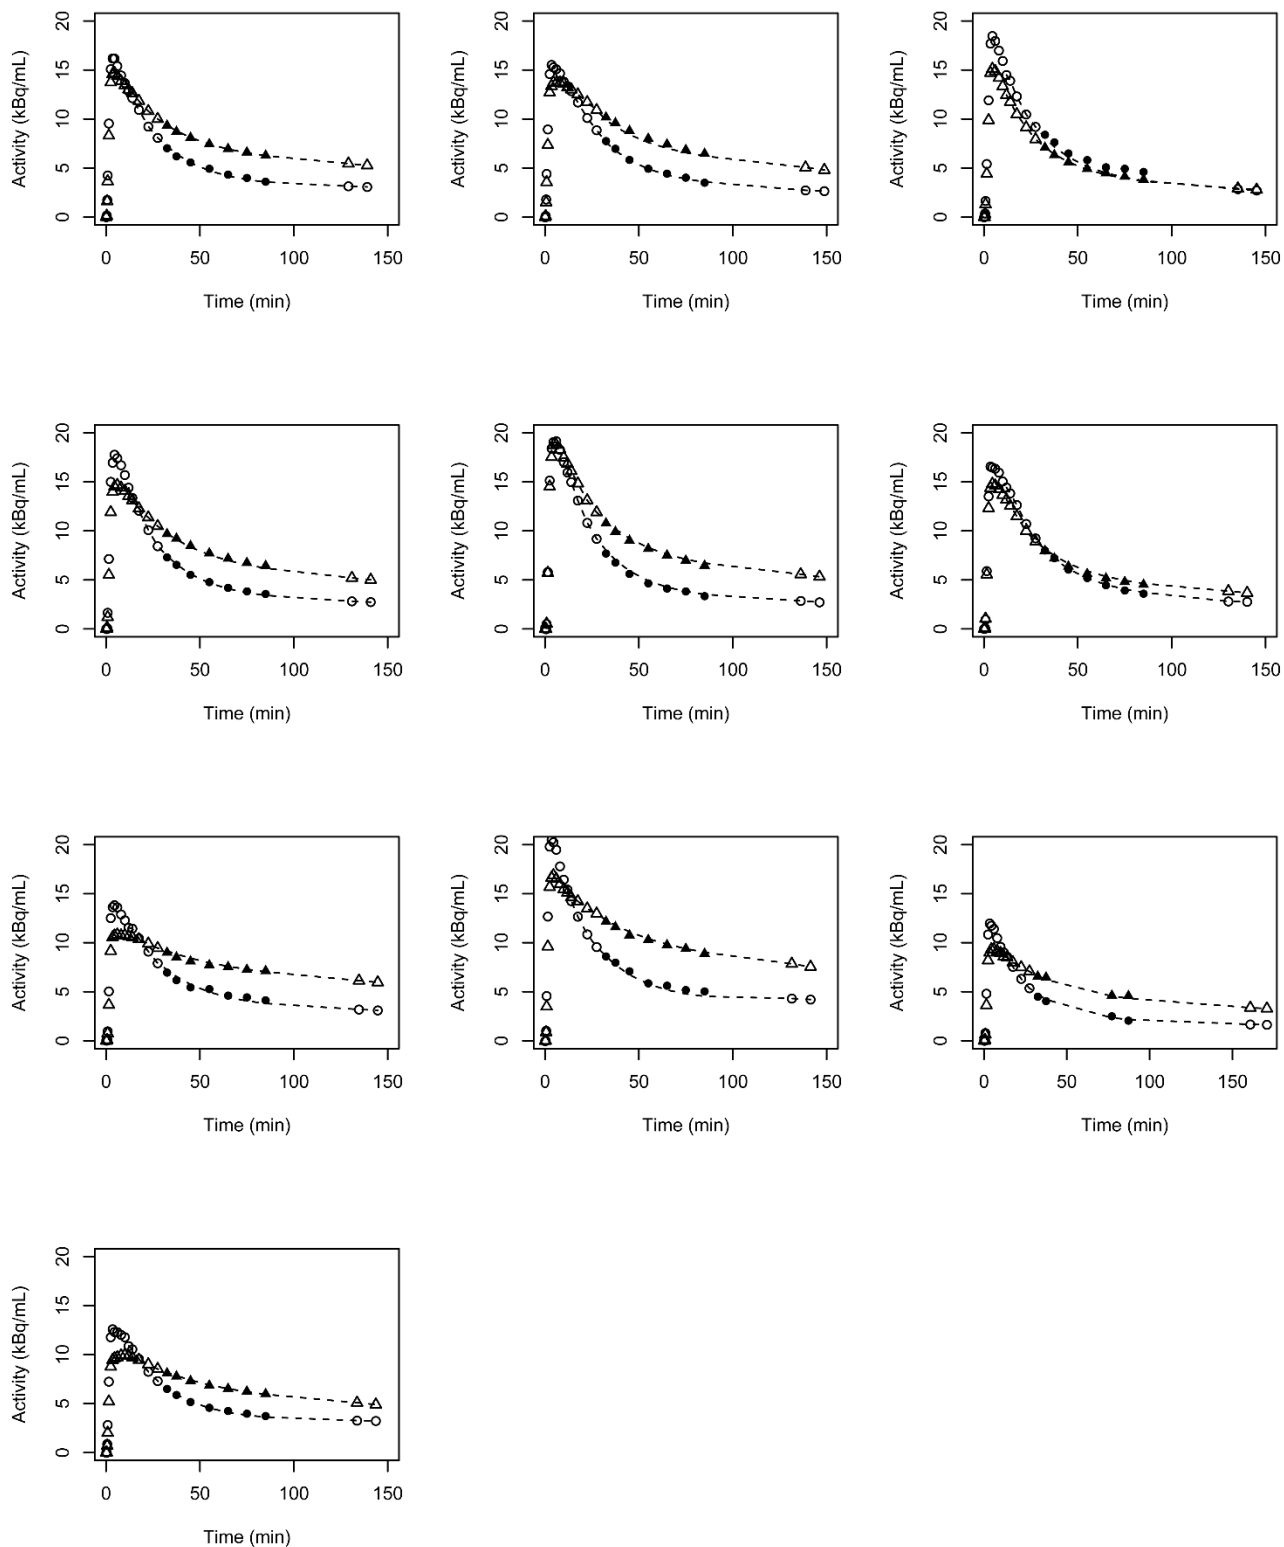

**Supplemental Figure 1.** Individual time-activity curves using interpolation based on the average time-activity curves on the Alzheimer’s dementia patients of the study cohort. Circles (cerebellar gray matter) and triangles (composite) show the acquired time-activity points. Filled circles and triangles are the points not used for interpolation because they would not be acquired in a dual-time window acquisition protocol. Dashed line shows the results of the interpolation.

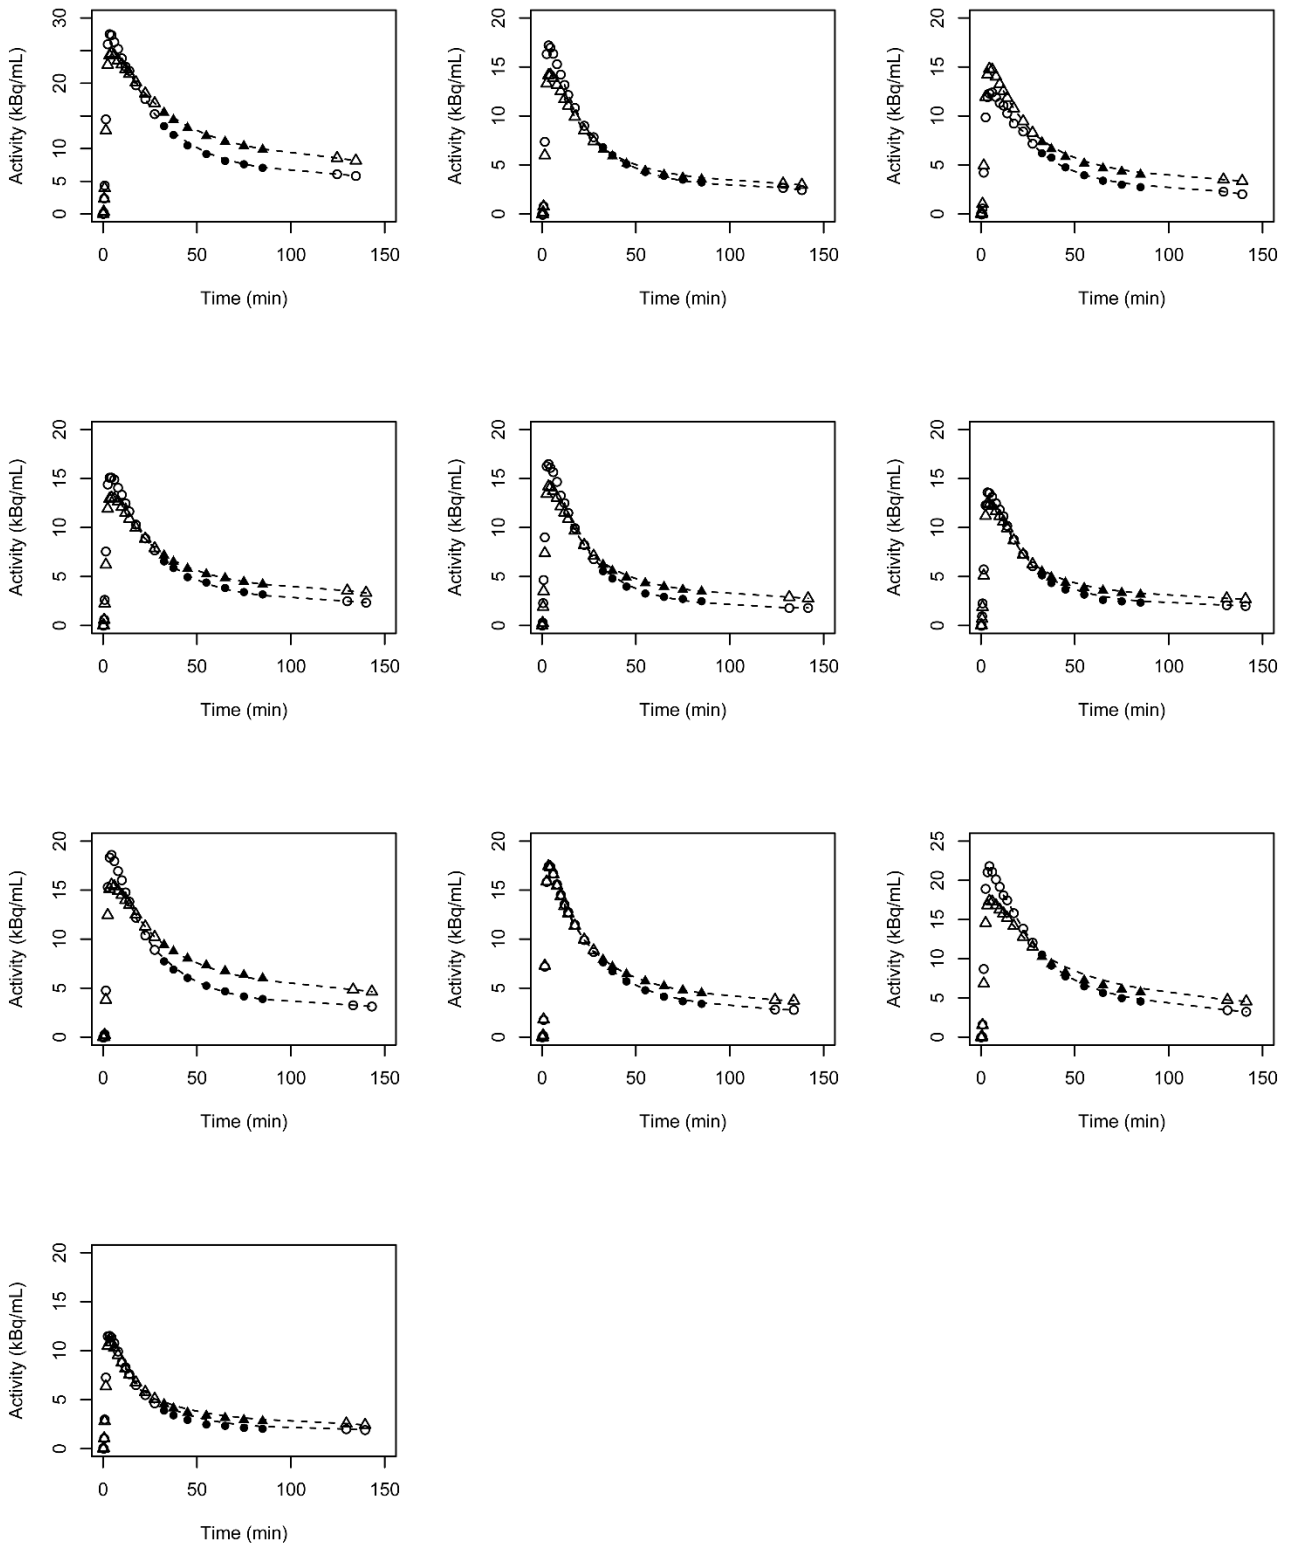

**Supplemental Figure 2.** Individual time-activity curves using interpolation based on the average time-activity curves on normal controls. Circles (cerebellar gray matter) and triangles (composite) show the acquired time-activity points. Filled circles and triangles are the points not used for interpolation because they would not be acquired in a dual-time window acquisition protocol. Dashed line shows the results of the interpolation.
